# Supplementary material for: Pulp–Dentin Regeneration via Cell Homing: Current Evidence and Perspectives on Cell-Free Regenerative Endodontic Therapy
Source: MDPI journal article supplement (doi:10.3390/medicina62020375), 2026-02-13
Supplement: s1 [file medicina-4113145-supplementary.pdf › medicina-4113145-supplementary.pdf]

# Supplementary Materials

Table S1: Quality Assessment Score.

|                                   | Item 1 | Item 2 | Item 3 | Item 4 | Item 5 | Item 6 | Item 7 | Item 8 | Item 9 | Item 10 | Item 11 | Item 12 | Item 13 | Final Score |
|-----------------------------------|--------|--------|--------|--------|--------|--------|--------|--------|--------|---------|---------|---------|---------|-------------|
| Abdelgawad L. M. et al. (2021)    | 2      | 3      | 3      | 3      | 1      | 2      | 3      | 3      | 3      | 1       | 3       | N/A     | 2       | 29/36       |
| Al-Ateeq R. et al. (2024)         | 3      | 2      | 3      | 2      | 3      | 2      | 3      | 2      | 3      | 1       | 2       | N/A     | 1       | 27/36       |
| Bagio D. A. et al. (2021)         | 3      | 3      | 3      | 3      | 3      | 2      | 3      | 1      | 3      | 0       | 3       | N/A     | 1       | 28/36       |
| Bagio D. A. et al. (2024)         | 3      | 3      | 3      | 3      | 2      | 1      | 3      | 2      | 2      | 2       | 3       | N/A     | 2       | 29/36       |
| Bagio D. A. et al. (2023)         | 3      | 3      | 3      | 3      | 3      | 2      | 3      | 3      | 3      | 2       | 3       | N/A     | 3       | 34/36       |
| Bordini E.A.F. et al. (2022)      | 3      | 3      | 3      | 3      | 3      | 3      | 3      | 3      | 1      | 2       | 3       | N/A     | 2       | 32/36       |
| Bordini E.A.F. et al. (2024)      | 3      | 3      | 3      | 3      | 1      | 1      | 3      | 2      | 3      | 2       | 3       | N/A     | 1       | 28/36       |
| Caballero-Flores H. et al. (2021) | 3      | 3      | 2      | 3      | 2      | 1      | 2      | 1      | 3      | 1       | 3       | N/A     | 2       | 26/36       |
| Chang B. et al. (2020)            | 3      | 2      | 2      | 3      | 1      | 2      | 3      | 2      | 3      | 1       | 3       | N/A     | 1       | 26/36       |
| Chang M. C. et al. (2020)         | 3      | 3      | 3      | 3      | 3      | 1      | 3      | 2      | 3      | 1       | 3       | N/A     | 2       | 30/36       |
| Chen Y. et al. (2022)             | 3      | 3      | 2      | 3      | 2      | 1      | 2      | 2      | 3      | 1       | 3       | N/A     | 2       | 27/36       |
| Ha M. et al. (2020)               | 3      | 3      | 3      | 2      | 2      | 1      | 3      | 2      | 2      | 1       | 2       | N/A     | 2       | 26/36       |
| Hong S. et al. (2018)             | 3      | 2      | 2      | 3      | 2      | 1      | 3      | 1      | 2      | 2       | 2       | N/A     | 1       | 24/36       |
| Hong S. et al. (2019)             | 3      | 2      | 2      | 3      | 2      | 1      | 3      | 3      | 3      | 1       | 2       | N/A     | 2       | 27/36       |
| Jiang L. et al. (2020)            | 3      | 2      | 3      | 3      | 2      | 1      | 3      | 1      | 2      | 2       | 3       | N/A     | 2       | 27/36       |
| Jin W. et al. (2023)              | 3      | 3      | 3      | 3      | 2      | 2      | 1      | 3      | 2      | 1       | 2       | N/A     | 2       | 27/36       |
| Karkehabadi H. et al. (2023)      | 3      | 3      | 3      | 3      | 3      | 1      | 3      | 2      | 2      | 2       | 3       | N/A     | 2       | 30/36       |
| Ke Z. et al. (2019)               | 2      | 2      | 3      | 3      | 2      | 1      | 1      | 1      | 2      | 1       | 2       | N/A     | 2       | 22/36       |
| Kim M. S. et al. (2022)           | 3      | 3      | 1      | 3      | 1      | 0      | 2      | 1      | 1      | 0       | 2       | N/A     | 1       | 18/36       |
| Kornsuthisopon C. et al. (2022)   | 2      | 2      | 3      | 3      | 1      | 1      | 3      | 2      | 3      | 2       | 3       | N/A     | 1       | 26/36       |
| Lay S. (2023)                     | 3      | 3      | 2      | 3      | 1      | 1      | 1      | 2      | 0      | 1       | 2       | N/A     | 1       | 20/36       |
| Le S. H. et al. (2024)            | 1      | 2      | 2      | 3      | 1      | 2      | 2      | 2      | 1      | 2       | 3       | N/A     | 3       | 24/36       |

|                                |   |   |   |   |   |   |   |   |   |   |   |     |   |       |
|--------------------------------|---|---|---|---|---|---|---|---|---|---|---|-----|---|-------|
| Leite M. L. et al. (2021)      | 3 | 3 | 3 | 3 | 3 | 2 | 3 | 3 | 3 | 2 | 3 | N/A | 2 | 33/36 |
| Leite M. L. et Al. (2022)      | 3 | 3 | 3 | 3 | 3 | 2 | 3 | 3 | 3 | 3 | 3 | N/A | 2 | 34/36 |
| Li M. et al. (2018)            | 3 | 2 | 2 | 3 | 0 | 2 | 3 | 3 | 3 | 1 | 3 | N/A | 1 | 26/36 |
| Liang H. et al. (2023)         | 3 | 2 | 2 | 3 | 0 | 1 | 2 | 1 | 2 | 0 | 2 | N/A | 2 | 20/36 |
| Liu S. et al. (2022)           | 3 | 3 | 2 | 3 | 0 | 1 | 3 | 2 | 3 | 1 | 3 | N/A | 2 | 26/36 |
| Liu Y. et al. (2022)           | 3 | 3 | 2 | 3 | 1 | 1 | 3 | 2 | 3 | 2 | 3 | N/A | 2 | 28/36 |
| Loukelis K. et al. (2023)      | 3 | 3 | 2 | 3 | 1 | 2 | 3 | 3 | 3 | 2 | 2 | N/A | 3 | 30/36 |
| Lv H. et al.                   | 3 | 3 | 3 | 3 | 1 | 1 | 3 | 1 | 3 | 2 | 3 | N/A | 2 | 28/36 |
| Margono A. et al. (2020)       | 2 | 3 | 2 | 3 | 1 | 1 | 2 | 1 | 2 | 0 | 2 | N/A | 1 | 20/36 |
| Margono A. et al. (2023)       | 3 | 2 | 3 | 3 | 2 | 2 | 3 | 3 | 2 | 2 | 2 | N/A | 3 | 30/36 |
| Moreira M. S. et al. (2021)    | 3 | 2 | 3 | 3 | 2 | 1 | 3 | 3 | 2 | 1 | 3 | N/A | 2 | 28/36 |
| Mu X. et al. (2020)            | 3 | 3 | 3 | 3 | 2 | 1 | 3 | 2 | 2 | 2 | 3 | N/A | 2 | 29/36 |
| Noohi P. et al. (2023)         | 3 | 3 | 3 | 3 | 2 | 2 | 3 | 3 | 3 | 2 | 3 | N/A | 3 | 33/36 |
| Pan J. et al. (2024)           | 3 | 2 | 3 | 3 | 3 | 1 | 3 | 3 | 3 | 1 | 3 | N/A | 3 | 31/36 |
| Rewthamrongsris P. (2024)      | 2 | 2 | 3 | 3 | 3 | 1 | 3 | 2 | 2 | 1 | 3 | N/A | 2 | 27/36 |
| Ruangsaewasdi N. et al. (2017) | 3 | 2 | 2 | 3 | 2 | 1 | 2 | 2 | 1 | 2 | 3 | N/A | 3 | 26/36 |
| Shrestha S. et al. (2019)      | 3 | 3 | 3 | 3 | 2 | 2 | 3 | 3 | 1 | 3 | 3 | N/A | 2 | 31/36 |
| Soares D.G. et al. (2021)      | 3 | 2 | 3 | 3 | 1 | 1 | 3 | 1 | 3 | 2 | 3 | N/A | 2 | 27/36 |
| Srisuwan T. et al. (2022)      | 2 | 3 | 3 | 3 | 2 | 1 | 3 | 2 | 3 | 3 | 3 | N/A | 3 | 31/36 |
| Sun X. et al. (2019)           | 3 | 3 | 3 | 3 | 2 | 2 | 3 | 2 | 2 | 2 | 3 | N/A | 3 | 31/36 |
| Terranova L. et al. (2021)     | 3 | 2 | 3 | 3 | 2 | 2 | 3 | 2 | 2 | 2 | 3 | N/A | 3 | 30/36 |
| Tian S. et al. (2020)          | 3 | 2 | 2 | 3 | 2 | 2 | 3 | 2 | 3 | 2 | 3 | N/A | 2 | 29/36 |
| Wang D. et al. (2021)          | 3 | 2 | 3 | 3 | 2 | 3 | 3 | 3 | 3 | 2 | 3 | N/A | 3 | 33/36 |
| Wang F. et al. (2019)          | 2 | 3 | 3 | 3 | 2 | 2 | 3 | 3 | 2 | 3 | 3 | N/A | 3 | 32/36 |
| Wang J.-H. et al.              | 3 | 2 | 3 | 3 | 1 | 1 | 3 | 2 | 2 | 2 | 3 | N/A | 1 | 26/36 |
| Wang N. et al. (2022)          | 3 | 2 | 3 | 3 | 1 | 2 | 3 | 1 | 1 | 2 | 3 | N/A | 2 | 26/36 |

|                                     |   |   |   |   |   |   |   |   |   |   |   |     |   |       |
|-------------------------------------|---|---|---|---|---|---|---|---|---|---|---|-----|---|-------|
| <b>Wang S. et al. (2019)</b>        | 2 | 3 | 3 | 3 | 1 | 2 | 2 | 2 | 3 | 2 | 3 | N/A | 2 | 28/36 |
| <b>Wang S. et al. (2021)</b>        | 3 | 3 | 3 | 3 | 3 | 3 | 3 | 3 | 3 | 3 | 3 | N/A | 2 | 35/36 |
| <b>Wang S. et al. (2023)</b>        | 3 | 2 | 3 | 3 | 2 | 1 | 3 | 3 | 3 | 3 | 3 | N/A | 3 | 32/36 |
| <b>Wei J. et al. (2021)</b>         | 3 | 2 | 2 | 3 | 2 | 2 | 3 | 2 | 3 | 2 | 3 | N/A | 1 | 28/36 |
| <b>Widbiller M. et al. (2022)</b>   | 3 | 3 | 3 | 3 | 3 | 3 | 3 | 3 | 3 | 3 | 3 | N/A | 3 | 36/36 |
| <b>Xiao M. et al. (2022)</b>        | 3 | 3 | 3 | 3 | 3 | 1 | 3 | 3 | 3 | 2 | 3 | N/A | 3 | 33/36 |
| <b>Yuan S. et al. (2023)</b>        | 3 | 3 | 2 | 3 | 2 | 1 | 3 | 3 | 3 | 2 | 3 | N/A | 3 | 31/36 |
| <b>Zhang R. et al. (2020)</b>       | 3 | 3 | 2 | 3 | 3 | 1 | 3 | 2 | 3 | 2 | 3 | N/A | 3 | 31/36 |
| <b>Zhao J. et al. (2023)</b>        | 3 | 2 | 3 | 3 | 2 | 1 | 3 | 2 | 3 | 3 | 3 | N/A | 3 | 31/36 |
| <b>Zheng L. et al. (2022)</b>       | 3 | 3 | 3 | 3 | 1 | 1 | 3 | 1 | 1 | 2 | 3 | N/A | 3 | 27/36 |
| <b>Zhu Y. et al. (2024)</b>         | 2 | 2 | 2 | 3 | 3 | 1 | 3 | 3 | 3 | 2 | 3 | N/A | 2 | 29/36 |
| <b>Abo-Heikal MM. et al. (2024)</b> | 3 | 3 | 3 | 3 | 3 | 3 | 3 | 3 | 3 | 3 | 3 | N/A | 3 | 36/36 |
| <b>Shetty H. et al. (2021)</b>      | 2 | 3 | 3 | 3 | 3 | 3 | 3 | 3 | 3 | 3 | 3 | N/A | 3 | 35/36 |
| <b>Theekakul C. (2024)</b>          | 2 | 2 | 3 | 3 | 3 | 3 | 3 | 3 | 3 | 3 | 3 | N/A | 3 | 34/36 |
| <b>Widbiller M. et al. (2022)</b>   | 3 | 3 | 3 | 3 | 3 | 3 | 3 | 3 | 3 | 3 | 3 | N/A | 3 | 36/36 |
| <b>Zhang Y. et al. (2024)</b>       | 3 | 3 | 3 | 2 | 3 | 2 | 3 | 3 | 3 | 3 | 3 | N/A | 3 | 34/36 |
